# Supplementary material
Source: Research Square preprint supplement (doi:10.21203/rs.3.rs-9358268/v1)
Supplement: Supplementary file 1 [file 917a8030faf82c046cde9dfd.xlsx]

## Sheet: Sheet1
Item	Dry mass （g）	Length （mm）	Width（mm）	Area （mm2）	LMA （g/m2）
CT1	0.0089	21.2969	2.3234	1.55415	57.2662		Table 1 Morphological changes of leaves under different treatments in C. lanceolata.
CT2	0.012065	30.0097	2.7499	2.59217	46.5441		Treatment		Dry mass	Length	Width	Area	LMA
CT3	0.01565	43.2599	2.7073	3.67937	42.5345				(g)	(mm)	(mm)	(mm2)	(g m-2)
CT4	0.018025	41.757	2.78495	3.64914	49.3952		CT		0.01±0.0016 A	33.14±4.13 B	2.62±0.09 A	2.76±0.41 B	50.54±2.90 AB
CT5	0.01325	29.3589	2.5206	2.32677	56.9458		W		0.02±0.0018 A	50.06±2.96 A	2.56±0.07 A	4.00±0.16 A	38.73±6.00 B
							D		0.02±0.0009 A	35.83±2.77 B	2.58±0.13 A	2.94±0.37 AB	60.02±7.39 A
W1	0.0155	53.2573	2.51015	4.19975	36.907		WD		0.02±0.0005 A	41.65±2.72 AB	2.68±0.09 A	3.49±0.17 AB	46.26±1.86 AB
W2	0.022165	40.9597	2.8009	3.60417	61.4983		W	F	0.124	12.644	0.061	8.917	6.384
W3	0.01295	53.9224	2.36665	4.01016	32.293			p	0.729	0.003	0.807	0.009	0.022
W4	0.01352	45.3608	2.59965	3.70468	36.4944		D	F	2.305	0.798	0.217	0.304	2.826
W5	0.0118525	56.782	2.5115	4.48009	26.4559			p	0.148	0.385	0.648	0.589	0.112
							W×D	F	0.791	3.016	0.768	1.331	0.037
D1	0.0150725	38.5511	2.46035	2.98073	50.5666			p	0.387	0.102	0.394	0.266	0.85
D2	0.018095	44.6267	3.066	4.29853	42.0958
D3	0.015495	29.3782	2.3861	2.20225	70.36
D4	0.0155025	35.9428	2.54895	2.87766	53.8718
D5	0.019465	30.6694	2.43045	2.33979	83.1913
WD1	0.016385	38.3841	2.57785	3.10852	52.7101
WD2	0.0167275	44.1991	2.55045	3.54149	47.2329
WD3	0.016215	47.5586	2.60695	3.89479	41.6326
WD4	0.014135	32.6197	3.0263	3.10255	45.5593
WD5	0.0167975	45.4837	2.66195	3.80315	44.1673
Item	C	N(mg/g)	P(mg/g)	C/N	N/P	C/P
CT1	446.801	5.04201	0.6625	88.6156	7.61058	674.416
CT2	456.474	6.22516	1.04388	73.3272	5.96348	437.285
CT3	453.049	6.16859	0.6989	73.4445	8.82614	648.231
CT4	459.701	5.25715	1.0308	87.4431	5.10006	445.965
CT5	456.028	5.02498	0.7345	90.7521	6.84136	620.868
W1	451.8	4.74072	0.784	95.302	6.04684	576.276
W2	463.522	4.90422	0.5969	94.515	8.21614	776.549
W3	450.588	5.76291	0.84	78.1876	6.8606	536.414
W4	442.118	5.45569	0.6155	81.0381	8.86383	718.308
W5	455.537	6.02701	0.7391	75.5827	8.15452	616.341
D1	449.183	6.83329	0.5309	65.7345	12.8711	846.078
D2	463.001	8.647	0.7273	53.5447	11.8892	636.602
D3	455.906	7.67838	0.7314	59.3753	10.4982	623.333
D4	410.244	5.46834	0.7526	75.0217	7.26593	545.102
D5	450.863	5.77184	0.604	78.1143	9.55603	746.462
WD1	454.556	5.75544	0.7477	78.9786	7.69752	607.939
WD2	463.362	6.17986	0.956	74.9794	6.46429	484.689
WD3	451.835	6.90428	0.7987	65.4427	8.6444	565.713
WD4	461.179	6.33572	0.841486	72.7904	7.5292	548.053		Fig. 2. C, N, and P stoichiometry characteristics of leaves under different treatments in C. lanceolata. (a) C concentration of leaves under different treatments, (b) N concentration of leaves under different treatments, (c) P concentration of leaves under different treatments, (d) the ratio of C to N in leaves under different treatments, (e) the ratio of C to P in leaves under different treatmen…
WD5	460.138	6.21996	0.757437	73.9776	8.21185	607.493
Item	Area （mm2）	LMA （g/m2）	PNUE(μmol g-1 s-1)	PPUE(μmol g-1 s-1)
CT1	1.55415	57.2662	23.7587	180.817
CT2	2.59217	46.5441	27.5118	164.066
CT3	3.67937	42.5345	35.7595	315.618
CT4	3.64914	49.3952	33.0987	168.805
CT5	2.32677	56.9458	24.6303	168.505
W1	4.19975	36.907	42.8624	259.182
W2	3.60417	61.4983	22.0656	181.294
W3	4.01016	32.293	40.2976	276.466
W4	3.70468	36.4944	33.0652	293.084
W5	4.48009	26.4559	58.0746	473.571
D1	2.98073	50.5666	20.0558	258.141			Fig. 3. Photosynthetic nutrient-use efficiency of leaves under different treatments in Cunninghamia lanceolata. (a) Photosynthetic N-use efficiency of leaves under different treatments, (b) photosynthetic P-use efficiency of leaves under different treatments.
D2	4.29853	42.0958	17.8433	212.142
D3	2.20225	70.36	15.4049	161.723
D4	2.87766	53.8718	24.6077	178.798
D5	2.33979	83.1913	15.0972	144.269
WD1	3.10852	52.7101	21.9479	168.945
WD2	3.54149	47.2329	27.5786	178.276
WD3	3.89479	41.6326	21.3259	184.35
WD4	3.10255	45.5593	22.0162	165.765
WD5	3.80315	44.1673	24.7465	203.214
							Fig. 4. Relationships between photosynthetic nutrient-use efficiency of leaves and LMA in C. lanceolata. (a) Relationships between photosynthetic N-use efficiency of leaves and LMA, (b) Relationships between photosynthetic P-use efficiency of leaves and LMA.
Item	Structural P(mg/g)	Metabolic P(mg/g)	Nucleic acid P(mg/g)	Residual P(mg/g)
CT1	0.18086	0.22711	0.18663	0.06797
CT2	0.29563	0.44699	0.21986	0.0814
CT3	0.20464	0.33666	0.10679	0.05081
CT4	0.32336	0.40294	0.2275	0.077
CT5	0.26347	0.2277	0.17995	0.06339
W1	0.32842	0.26154	0.11462	0.0795
W2	0.22587	0.1466	0.15878	0.0656
W3	0.31399	0.25326	0.19328	0.07946
W4	0.24774	0.16902	0.1492	0.04961
W5	0.23215	0.27753	0.15972	0.06962
D1	0.15433	0.2045	0.1263	0.04576
D2	0.24255	0.24532	0.17353	0.06589
D3	0.26213	0.23083	0.17627	0.06217
D4	0.25564	0.2354	0.19665	0.06493
D5	0.18343	0.19781	0.16429	0.05859
WD1	0.25558	0.27279	0.15748	0.06924
WD2	0.36586	0.30907	0.17332	0.10774
WD3	0.30359	0.24903	0.16062	0.08546
WD4	0.35485	0.19405	0.19329	0.09921
WD5	0.2317	0.37395	0.10816	0.04363
							Fig. 5. P fractions and their proportion of leaves under different treatments in C. lanceolata. Treatment: control (CT), warming (W), water stress (D), and warming plus water stress (WD). Values are mean ± SD (n=5).
							Fig. 6. The relationship between the proportions of the four P fractions in C. lanceolata. (a) Relationship between metabolic P proportion and structural P proportion. (b) Relationship between metabolic P proportion and nucleic P proportion.
	Fig. 7. The correlation between the surface morphology, nutrient stoichiometry, photosynthetic nutrient-use efficiency, and P fractions of different treatment leaves. (a) CT treatment. (b) W treatment. (c) D treatment. (d) WD treatment.
