# Supplementary material
Source: Research Square preprint supplement (doi:10.21203/rs.3.rs-9358268/v1)
Supplement: Supplementary file 1 [file ecaaad261d9d6d521ca5ac17.docx]

**Appendix Supplementary data**

Here we add the basic situation of soil in the sample plot, Part of the data in Table S1 are from (Cao et al., 2020).

**Table S1**

Soil properties under different treatments

| **Treatments** | | **pH** | **Soil moisture** | **Soil temperature** | **NH4+-N (mg kg−1)** | **NO3--N (mg kg−1)** | **C**  **(g kg−1)** | **TN**  **(g kg−1)** | **TP**  **(g kg−1)** |
| --- | --- | --- | --- | --- | --- | --- | --- | --- | --- |
| CT | | 4.57(0.04)ab | 0.22(0.00)a | 25.83(0.89)b | 9.55(0.61)b | 1.93(0.29)b | 14.45(1.56)ab | 1.17(0.12)a | 0.32(0.01)a |
| W | | 4.63(0.01)a | 0.18(0.00)b | 31.42(0.28)a | 10.85(0.32)a | 1.76(0.23)b | 13.49(1.13)ab | 1.10(0.08)a | 0.32(0.01)a |
| D | | 4.53(0.04)b | 0.19(0.02)ab | 26.75(0.82)b | 9.63(0.67)b | 3.07(0.44)a | 15.12(2.57)a | 1.23(0.20)a | 0.34(0.01)a |
| WD | | 4.56(0.06)b | 0.17(0.02)b | 31.72(1.01)a | 9.53(0.50)b | 2.12(0.36)b | 11.63(1.73)b | 1.01(0.11)a | 0.32(0.01)a |
| W | F | 7.74 | 12.96 | 217.89 | 1.56 | 6.09 | 7.46 | 5.34 | 3.12 |
|  | *p* | **0.01** | **0.00** | **0.00** | **0.00** | **0.03** | **0.02** | **0.03** | 0.10 |
| D | F | 10.15 | 7.67 | 2.92 | 26.28 | 6.64 | 0.54 | 0.00 | 3.12 |
|  | *p* | **0.01** | **0.01** | 0.11 | **0.00** | **0.02** | 0.47 | 0.07 | 0.10 |
| W×D | F | 1.13 | 1.11 | 0.74 | 7.20 | 8.31 | 2.42 | 0.03 | 0.97 |
|  | *p* | 0.30 | 0.31 | 0.40 | **0.02** | **0.01** | 0.14 | 1.54 | 0.34 |

Notes: Values are shown mean±SD (n = 5). Data with different capital letters refer to significantly different in different treatments at the 0.05 level. Treatment: warming (W), water stress (D), interactive effects of warming and water stress (W×D); signiﬁcant effect at *p* <0.05; highly signiﬁcant eﬀect at *p* <0.01. Bold numbers indicate significant differences. NH4+-N: ammonium, NO3﹣-N: nitrate, C: soil total C, TN: soil total N, TP: oil total P.
